# Supplementary material for: ALCAM shedding at the invasive front of the tumor is a marker of myometrial infiltration and promotes invasion in endometrioid endometrial cancer
Source: PubMed Central journal article supplement (PMC5908276; doi:10.18632/oncotarget.24625), 2018-03-30
Supplement: oncotarget-09-16648-s001.pdf [file oncotarget-09-16648-s001.pdf]

## ALCAM shedding at the invasive front of the tumor is a marker of myometrial infiltration and promotes invasion in endometrioid endometrial cancer

### SUPPLEMENTARY MATERIALS

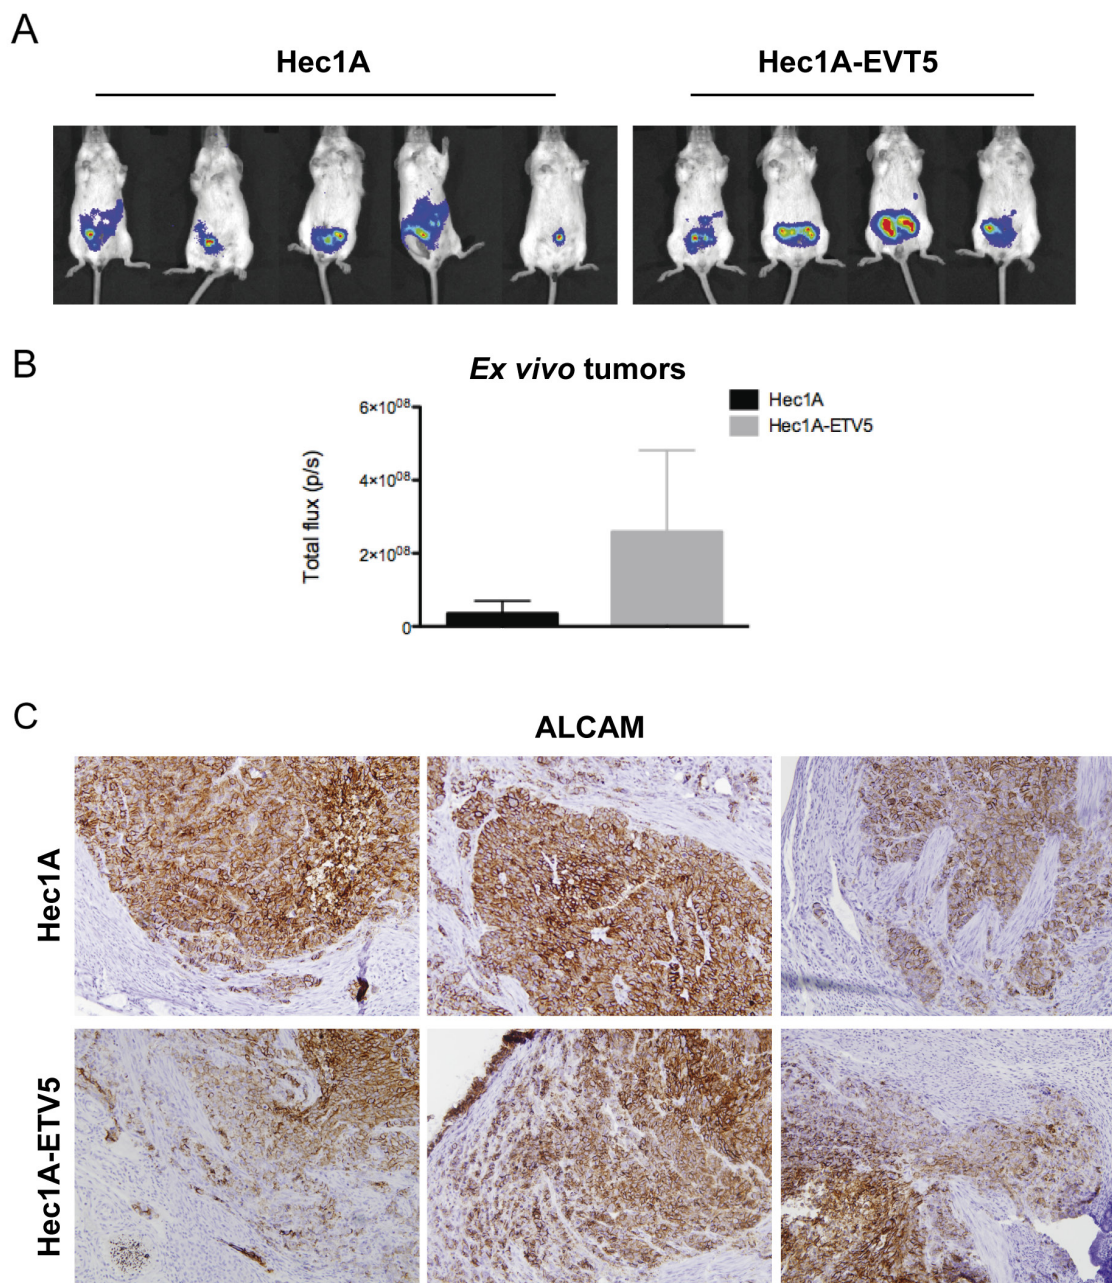

**Supplementary Figure 1: Hec1A and Hec1A-ETV5 orthotopic murine model.** (A) IVIS images of the injected mice evidenced a larger tumor growth in the ETV5-overexpressing cells. (B) Quantification of the luminescence of the primary tumors ex vivo evidenced a higher intensity in the ETV5-overexpressing mice ( $p=0.064$ ). (C) Upper: Images of ALCAM expression in Hec1A control mice, presenting less invasion and scattered clusters of cells. Down: Images of ALCAM in Hec1A-ETV5 mice, with higher rate of invasion and disseminated cells, with a finger-strand pattern. ALCAM staining was more homogeneous in the control model with lower invasion and more collective invasion.

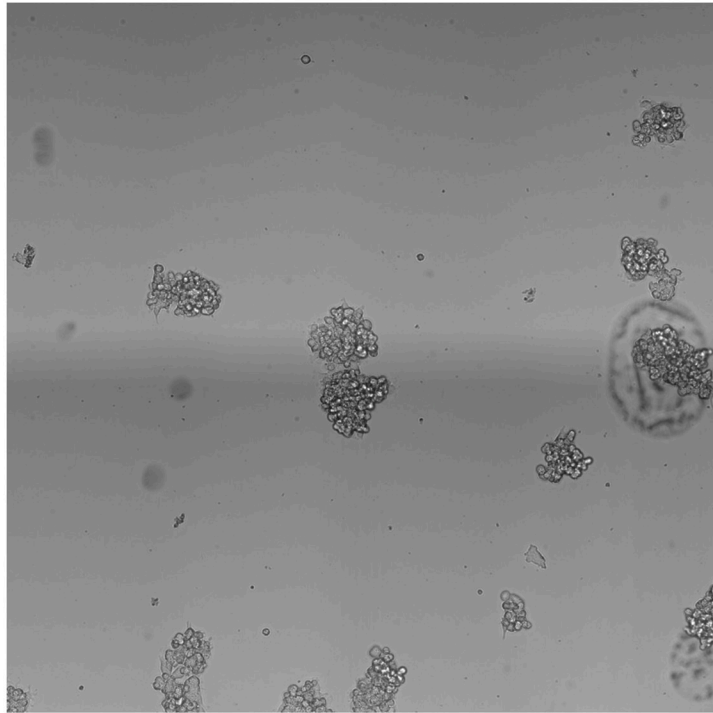

**Supplementary Video 1: Hec1A-ETV5 ALCAM<sup>cytoless</sup>-Cherry spreading aggregate on fibronectin-coated striped followed for 36 h.**

**See Supplementary Video 1**

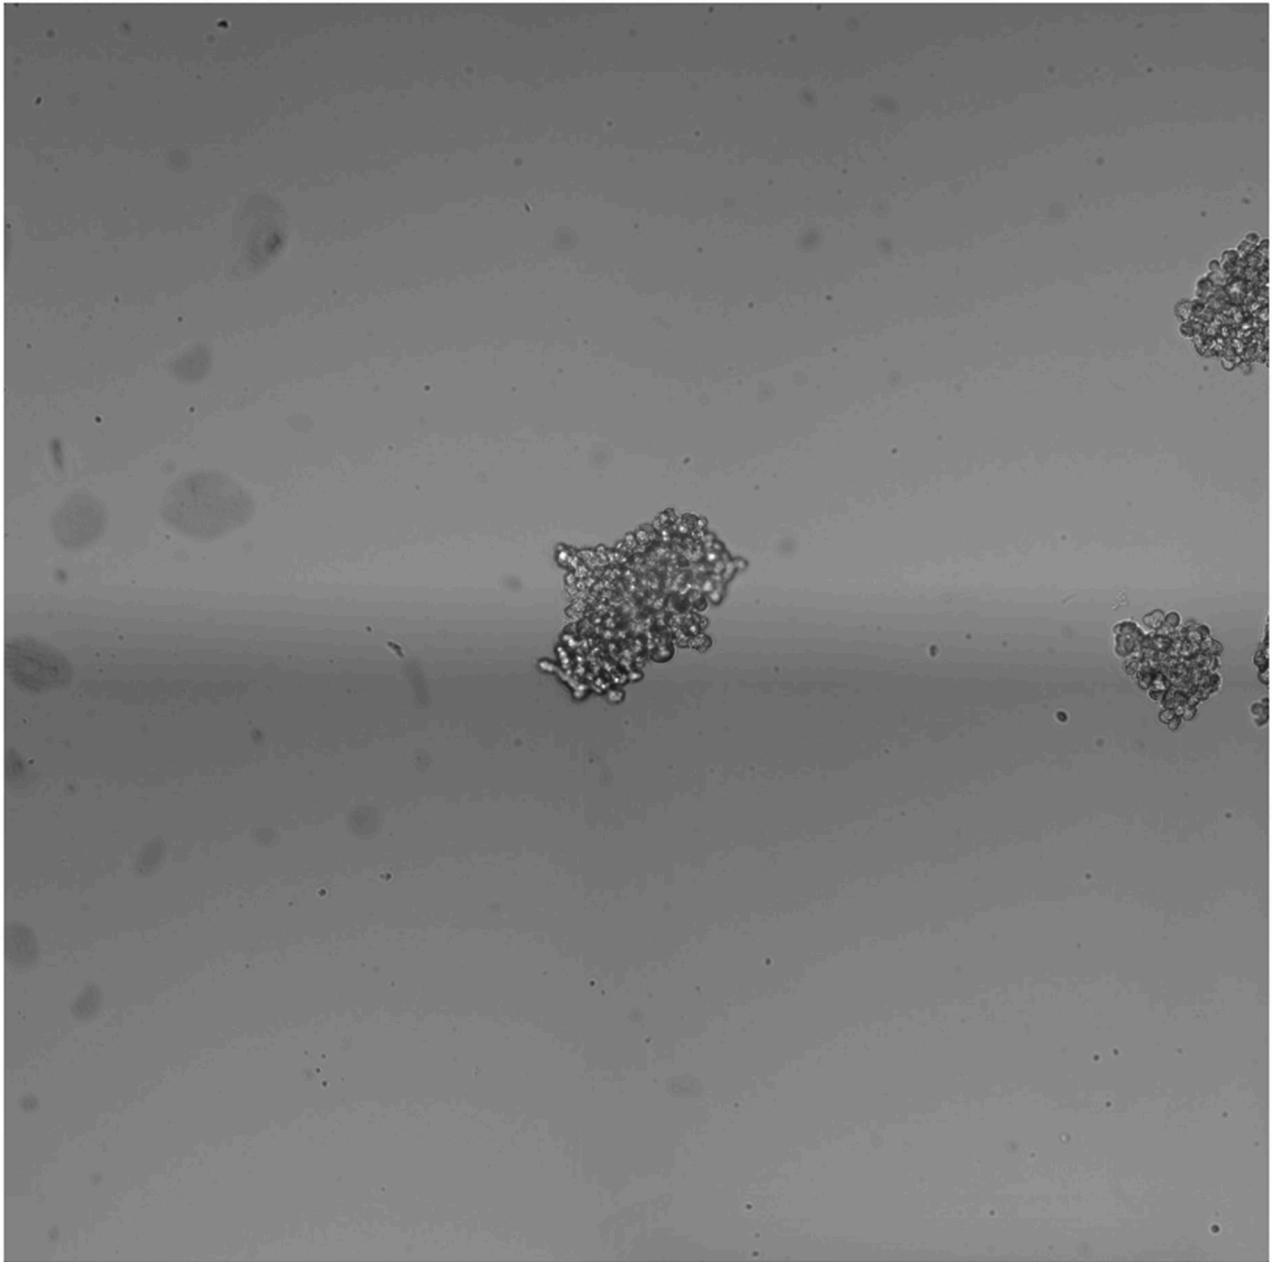

**Supplementary Video 2: Hec1A-ETV5 ALCAM-Cherry spreading aggregate on fibronectin-coated striped followed for 36 h.**

**See Supplementary Video 2**

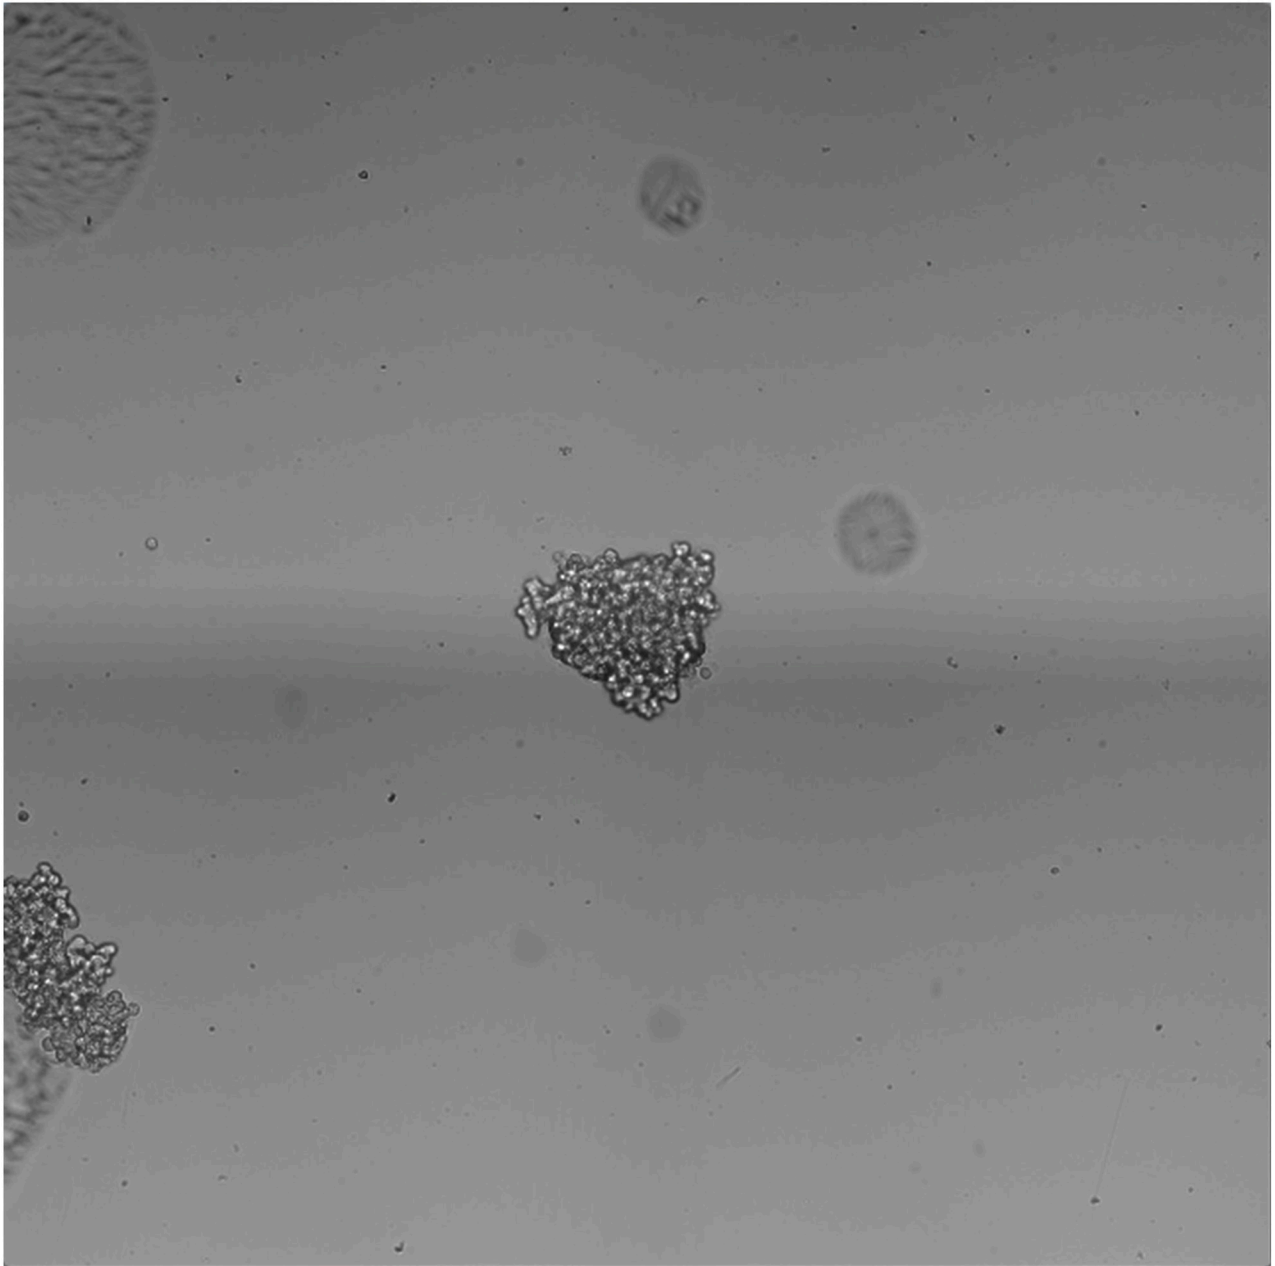

**Supplementary Video 3: Hec1A-ETV5 NCherry spreading aggregate on fibronectin-coated stripes followed for 36 h.**

**See Supplementary Video 3**

**Supplementary Table 1: Patterns of ALCAM in the tumor: univariate linear regression**

|                                      | All cases |            | Grade I |            | Grade > I |         |
|--------------------------------------|-----------|------------|---------|------------|-----------|---------|
|                                      | $\beta$   | p-value    | $\beta$ | p-value    | $\beta$   | p-value |
| <b>Superficial area of the tumor</b> |           |            |         |            |           |         |
| $\beta$ -catenin                     | 0.419     | < 0.001*** | 0.394   | < 0.001*** | 0.410     | 0.013*  |
| E-cadherin                           | 0.346     | < 0.001*** | 0.275   | 0.014*     | 0.462     | 0.004** |
| ETV5                                 | 0.026     | 0.791      | 0.033   | 0.780      | 0.027     | 0.878   |
| COX-2                                | 0.109     | 0.248      | 0.153   | 0.180      | 0.013     | 0.938   |
| MMP-9                                | -0.176    | 0.060      | -0.014  | 0.906      | -0.395    | 0.015*  |
| MMP-2                                | 0.247     | 0.008**    | 0.251   | 0.026*     | 0.246     | 0.143   |
| SNAIL                                | 0.214     | 0.028*     | 0.192   | 0.112      | 0.272     | 0.109   |
| SLUG                                 | 0.067     | 0.472      | 0.061   | 0.595      | 0.320     | 0.054   |
| <b>Invasive front of the tumor</b>   |           |            |         |            |           |         |
| $\beta$ -catenin                     | 0.144     | 0.174      | 0.181   | 0.157      | 0.017     | 0.933   |
| E-cadherin                           | 0.160     | 0.125      | 0.173   | 0.182      | 0.111     | 0.546   |
| ETV5                                 | -0.034    | 0.748      | 0.118   | 0.365      | -0.408    | 0.025*  |
| COX-2                                | 0.210     | 0.038*     | 0.221   | 0.073      | 0.188     | 0.310   |
| MMP-9                                | -0.242    | 0.018*     | -0.137  | 0.280      | -0.438    | 0.014*  |
| MMP-2                                | 0.035     | 0.723      | 0.029   | 0.808      | -         | -       |
| SNAIL                                | 0.300     | 0.005*     | 0.409   | 0.001**    | 0.005     | 0.980   |
| SLUG                                 | 0.036     | 0.711      | 0.018   | 0.883      | 0.168     | 0.343   |

**Supplementary Table 2: Patterns of ALCAM in the superficial and invasive areas of the tumor: multivariate linear regression**

| <b>Superficial area of the tumor</b>    |                      |                     |           |                     |                  |        |            |
|-----------------------------------------|----------------------|---------------------|-----------|---------------------|------------------|--------|------------|
|                                         | <b>Summary model</b> |                     |           | <b>Coefficients</b> |                  |        |            |
|                                         | R                    | R <sup>2</sup> adj. | p-value   | B                   | CI95%            | β      | p-value    |
| <b>All cases</b>                        | 0.437                | 0.183               | <0.001*** |                     |                  |        |            |
| Predictors                              |                      |                     |           |                     |                  |        |            |
| β-catenin                               |                      |                     |           | 1.765               | (1.045; 2.484)   | 0.437  | < 0.001*** |
| SNAIL                                   |                      |                     |           |                     |                  | 0.170  | 0.088      |
| E-cadherin                              |                      |                     |           |                     |                  | 0.166  | 0.096      |
| MMP-2                                   |                      |                     |           |                     |                  | 0.133  | 0.183      |
| <b>Grade</b>                            |                      |                     |           |                     |                  |        |            |
| <b>Well-differentiated</b>              | 0.394                | 0.144               | <0.001*** |                     |                  |        |            |
| Predictors                              |                      |                     |           |                     |                  |        |            |
| β-catenin                               |                      |                     |           | 1.592               | (0.733; 2.451)   | 0.394  | <0.001***  |
| E-cadherin                              |                      |                     |           |                     |                  | 0.089  | 0.449      |
| MMP-2                                   |                      |                     |           |                     |                  | 0.131  | 0.264      |
| <b>Moderately-poorly differentiated</b> | 0.445                | 0.174               | 0.007**   |                     |                  |        |            |
| Predictors                              |                      |                     |           |                     |                  |        |            |
| E-cadherin                              |                      |                     |           | 0.673               | (0.201; 1.146)   | 0.445  | 0.007**    |
| β-catenin                               |                      |                     |           |                     |                  | 0.276  | 0.109      |
| MMP-9                                   |                      |                     |           |                     |                  | -0.276 | 0.108      |
| <b>Invasive front of the tumor</b>      |                      |                     |           |                     |                  |        |            |
|                                         | <b>Summary model</b> |                     |           | <b>Coefficients</b> |                  |        |            |
|                                         | R                    | R <sup>2</sup> adj. | p-value   | B                   | CI95%            | β      | p-value    |
| <b>All cases</b>                        | 0.458                | 0.179               | <0.001*** |                     |                  |        |            |
| Predictors                              |                      |                     |           |                     |                  |        |            |
| SNAIL                                   |                      |                     |           | 0.396               | (0.075; 0.717)   | 0.259  | 0.016*     |
| MMP-9                                   |                      |                     |           | -1.330              | (-2.415; -0.244) | -0.250 | 0.017*     |
| COX2                                    |                      |                     |           | 0.522               | (0.089; 0.955)   | 0.253  | 0.019*     |
| <b>Grade</b>                            |                      |                     |           |                     |                  |        |            |
| <b>Well-differentiated</b>              | 0.409                | 0.152               | 0.001**   |                     |                  |        |            |
| Predictors                              |                      |                     |           |                     |                  |        |            |
| SNAIL                                   |                      |                     |           | 0.573               | (0.231; 0.915)   | 0.409  | 0.001**    |
| <b>Moderately-poorly differentiated</b> | 0.559                | 0.259               | 0.008**   |                     |                  |        |            |
| Predictors                              |                      |                     |           |                     |                  |        |            |
| ETV5                                    |                      |                     |           | -1.175              | (-2.283; -0.067) | -0.363 | 0.039*     |
| MMP-9                                   |                      |                     |           | -1.987              | (-3.917; -0.057) | -0.353 | 0.044*     |

**Supplementary Table 3: MMP-9 and ALCAM in uterine aspirates**

| <b>Matrix correlation MMP-9 forms (*)</b> |                |                   |                |                |  |  |
|-------------------------------------------|----------------|-------------------|----------------|----------------|--|--|
|                                           | <b>MMP-9 D</b> | <b>MMP-9 NGAL</b> | <b>MMP-9 L</b> | <b>MMP-9 A</b> |  |  |
| <b>MMP-9 D</b>                            |                | 0.815***          | 0.826***       | 0.552***       |  |  |
| <b>MMP-9 NGAL</b>                         | 0.815***       |                   | 0.699***       | 0.545***       |  |  |
| <b>MMP-9 L</b>                            | 0.826***       | 0.699***          |                | 0.543***       |  |  |
| <b>MMP-9 A</b>                            | 0.552***       | 0.545***          | 0.543***       |                |  |  |

(\*) ln-transformed

| <b>ALCAM correlation with MMP-9</b> |                                     |                |                                        |                |                                        |                |
|-------------------------------------|-------------------------------------|----------------|----------------------------------------|----------------|----------------------------------------|----------------|
|                                     | <b>Univariate linear regression</b> |                |                                        |                |                                        |                |
|                                     | <b>All cases</b>                    |                | <b>Myometrial infiltration &lt;50%</b> |                | <b>Myometrial infiltration &gt;50%</b> |                |
|                                     | <b>R</b>                            | <b>p-value</b> | <b>R</b>                               | <b>p-value</b> | <b>R</b>                               | <b>p-value</b> |
| MMP-9 Dimeric                       | 0.355                               | 0.025*         | 0.298                                  | 0.246          | 0.484                                  | 0.019*         |
| MMP-9 NGAL                          | 0.407                               | 0.009**        | 0.313                                  | 0.221          | 0.446                                  | 0.033*         |
| MMP-9 Latent                        | 0.385                               | 0.014*         | 0.282                                  | 0.272          | 0.326                                  | 0.129          |
| MMP-9 Active                        | 0.100                               | 0.541          | 0.197                                  | 0.449          | 0.095                                  | 0.666          |
| C1 Regression Factor Score          | 0.447                               | 0.004**        | 0.322                                  | 0.207          | 0.575                                  | 0.004**        |

**Supplementary Table 4: Human endometrial cancer samples**

| <b>TMA Description</b>         |                                |
|--------------------------------|--------------------------------|
| <b>Variable</b>                | <b><math>\Sigma</math> (%)</b> |
| <b>FIGO Stage</b>              | 116 (100.0)                    |
| Stage IA                       | 56 (48.3)                      |
| Stage IB                       | 41 (35.3)                      |
| Stage II                       | 15 (12.9)                      |
| Stage III                      | 4 (3.4)                        |
| <b>Grading</b>                 | 116 (100.0)                    |
| Grade I                        | 79 (68.1)                      |
| Grade II                       | 24 (20.7)                      |
| Grade III                      | 13 (11.2)                      |
| <b>Myometrial Infiltration</b> | 116 (100.0)                    |
| No                             | 58 (50.0)                      |
| Yes                            | 58 (50.0)                      |
| <b>Uterine aspirates</b>       |                                |
| <b>Variable</b>                | <b><math>\Sigma</math> (%)</b> |
| <b>FIGO Stage</b>              | 40 (100.0)                     |
| Stage IA                       | 15 (37.5)                      |
| Stage IB                       | 12 (30.0)                      |
| Stage II                       | 7 (17.5)                       |
| Stage III                      | 3 (7.5)                        |
| Stage IV                       | 3 (7.5)                        |
| <b>Myometrial Infiltration</b> | 40 (100.0)                     |
| No                             | 17 (42.5)                      |
| Yes                            | 23 (57.5)                      |
